# Supplementary material for: Thermal Decomposition of Bio-Based Plastic Materials
Source: Preprints.org preprint supplement (doi:10.20944/preprints202403.1607.v1), 2024-03-26
Supplement: Supplementary file 1 [file supplementary]

Thermal Decomposition of Bio-Based Plastic Materials

Inés Oliver1, Juan A. Conesa1,2,*, Andrés Fullana1,2

1 Institute of Chemical Process Engineering, University of Alicante, Ap.99, 03080, Alicante, Spain.

2 Department of Chemical Engineering, University of Alicante, Ap. 99, 03080, Alicante, Spain.

* Corresponding author: [ja.conesa@ua.es](mailto:ja.conesa@ua.es)

SUPPLEMENTARY MATERIAL


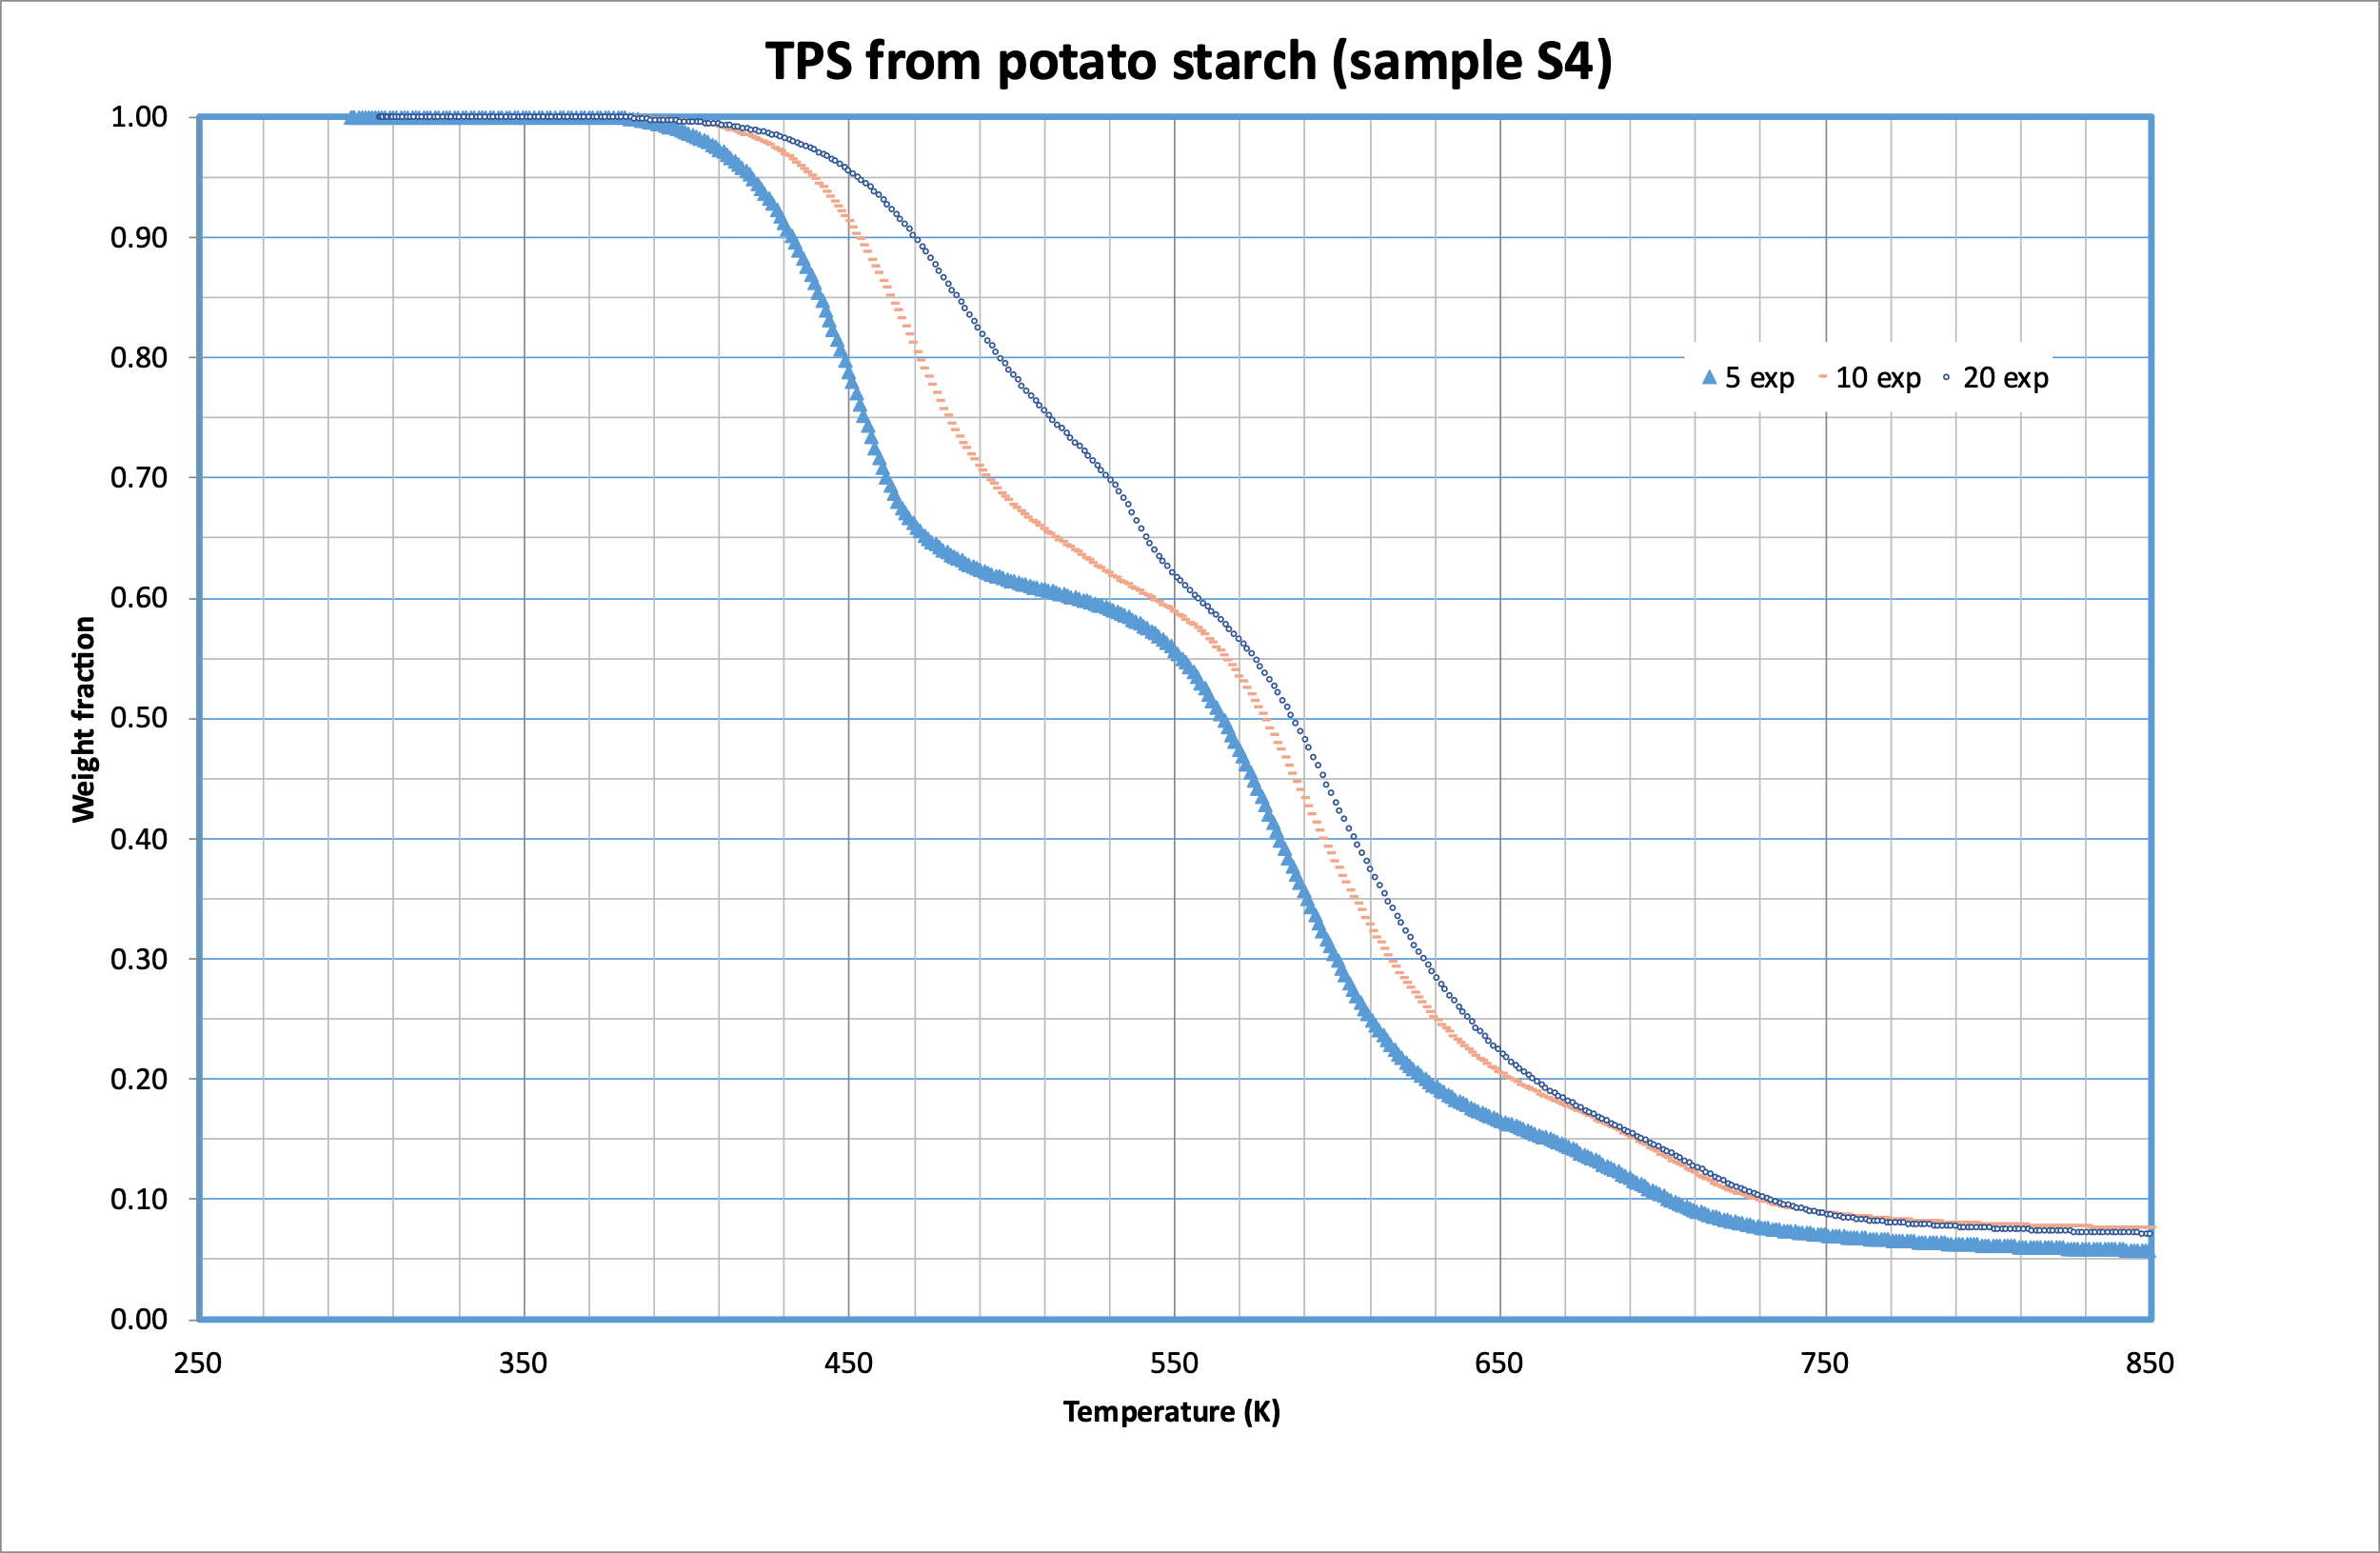


*Figure SM1. Pyrolysis of TPS from potato starch at three heating rates.*


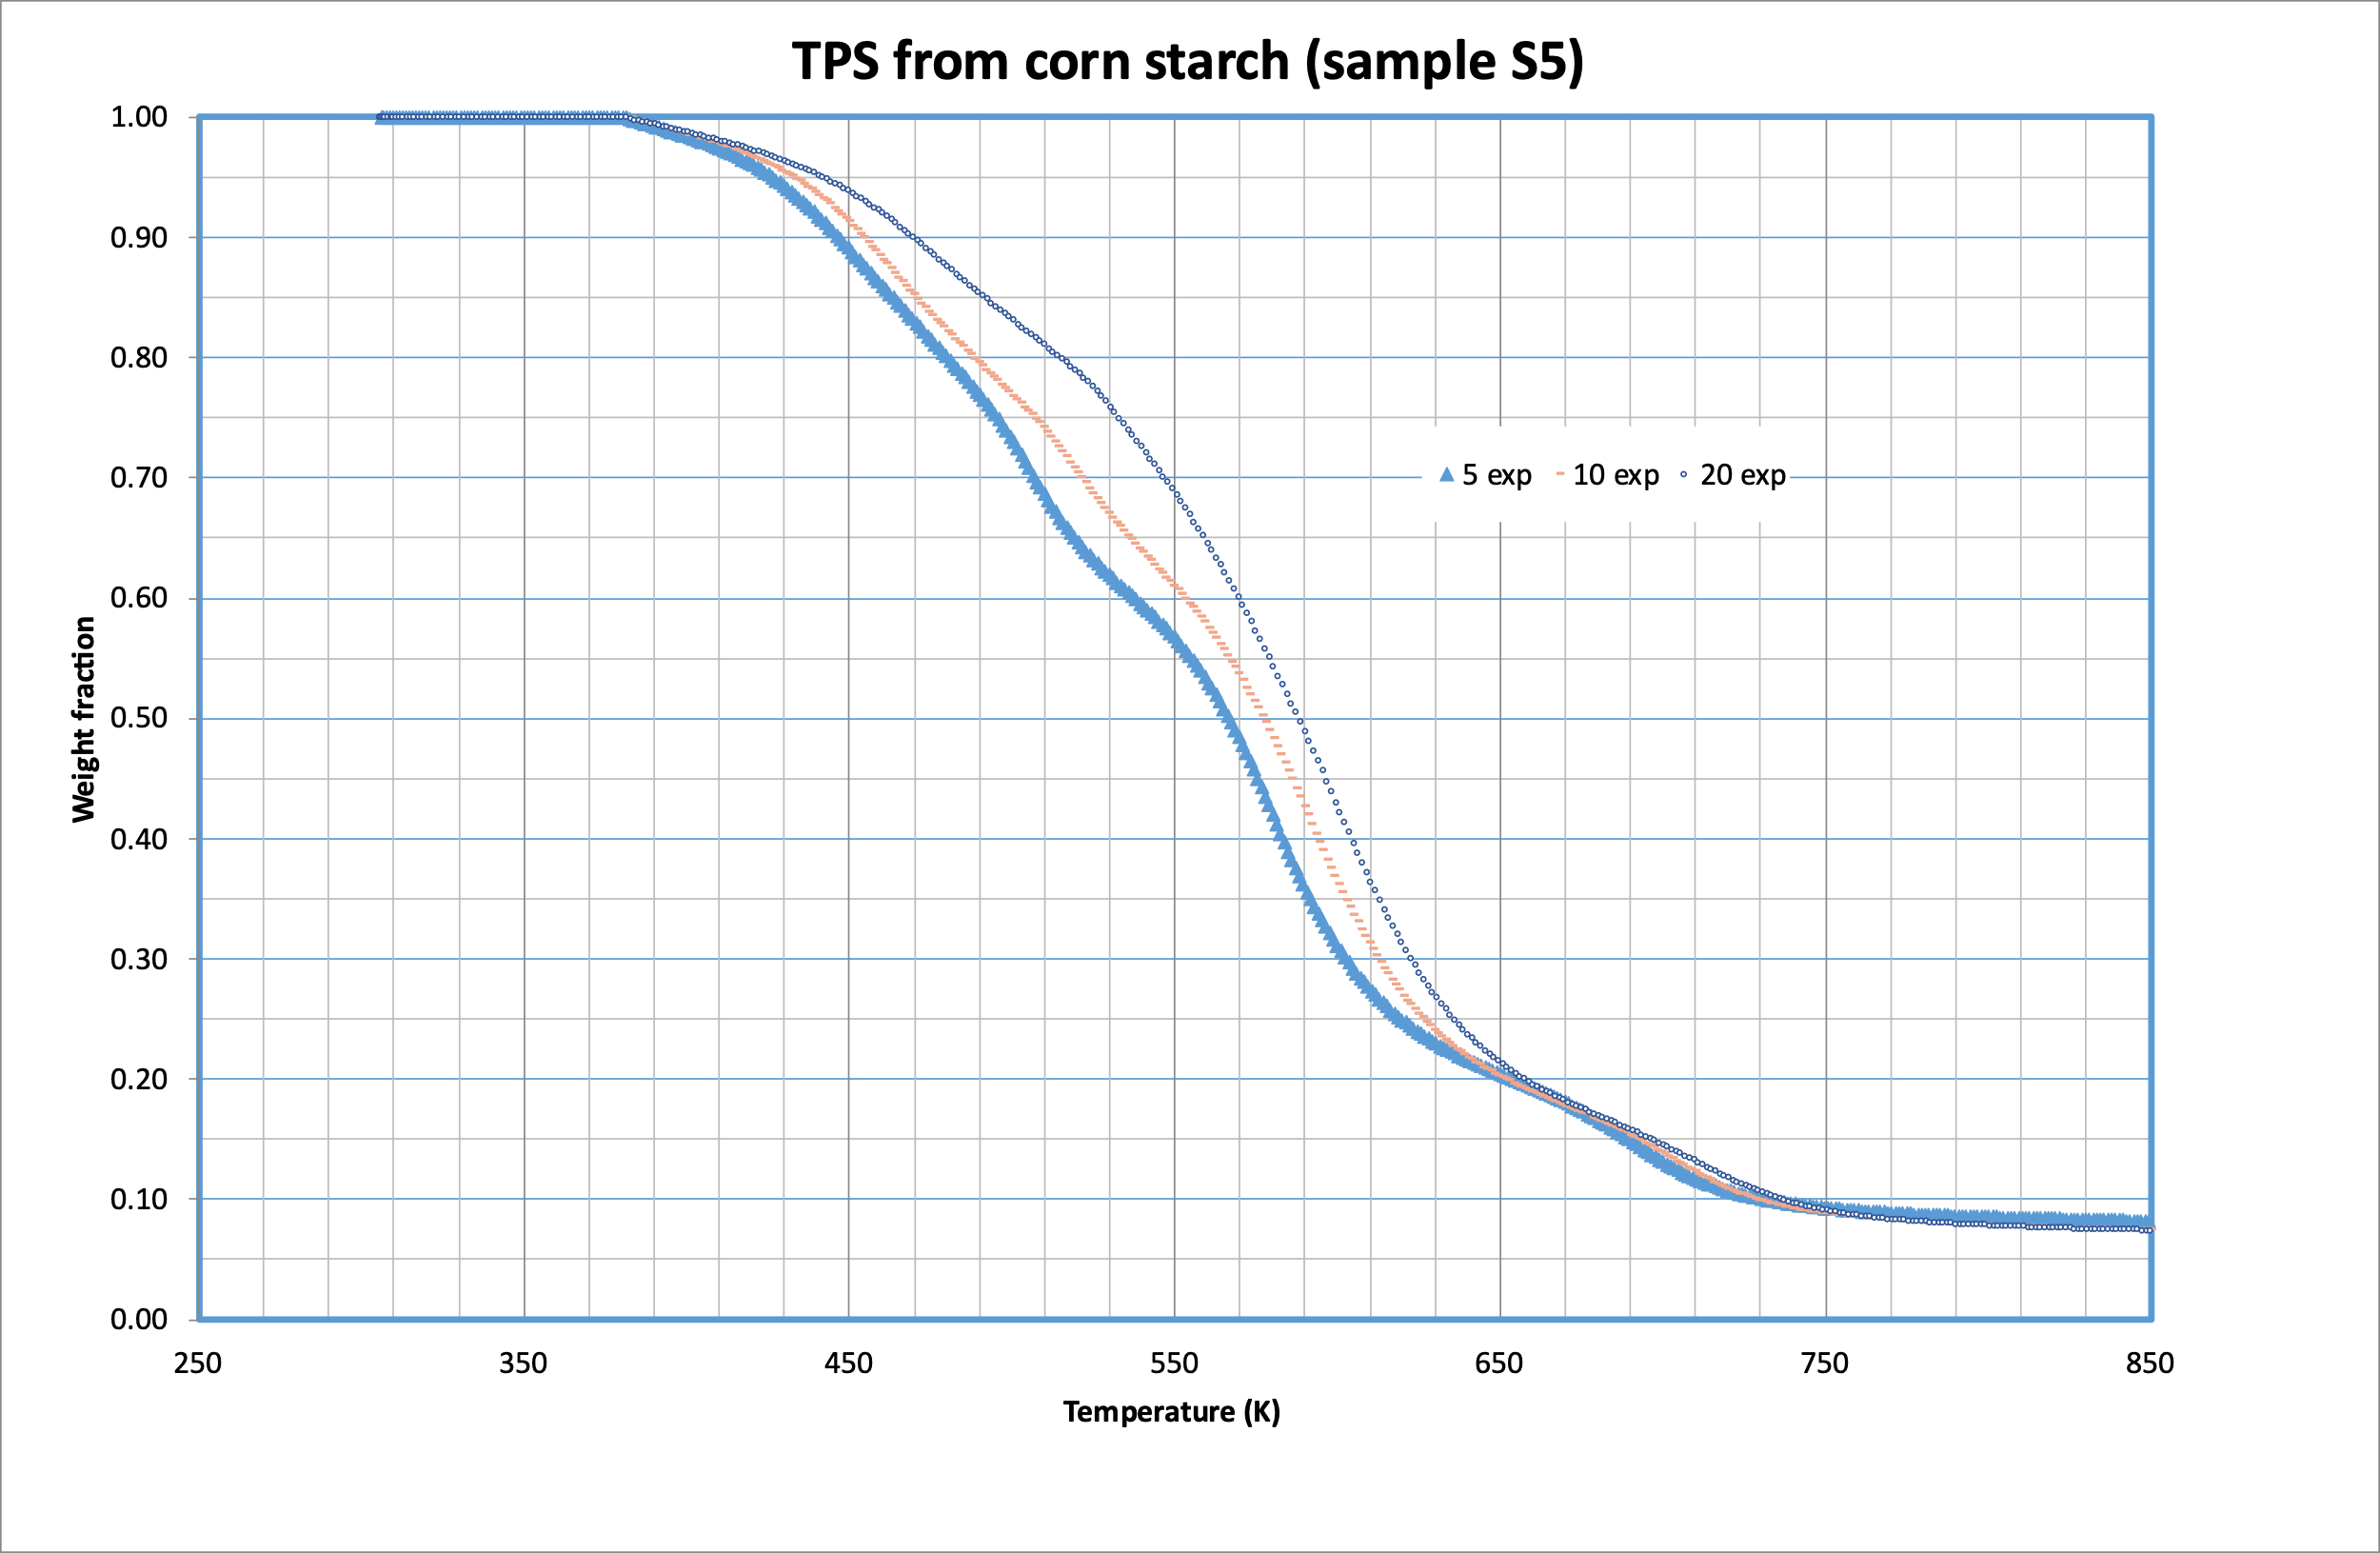


*Figure SM2. Pyrolysis of TPS from corn starch at three heating rates.*


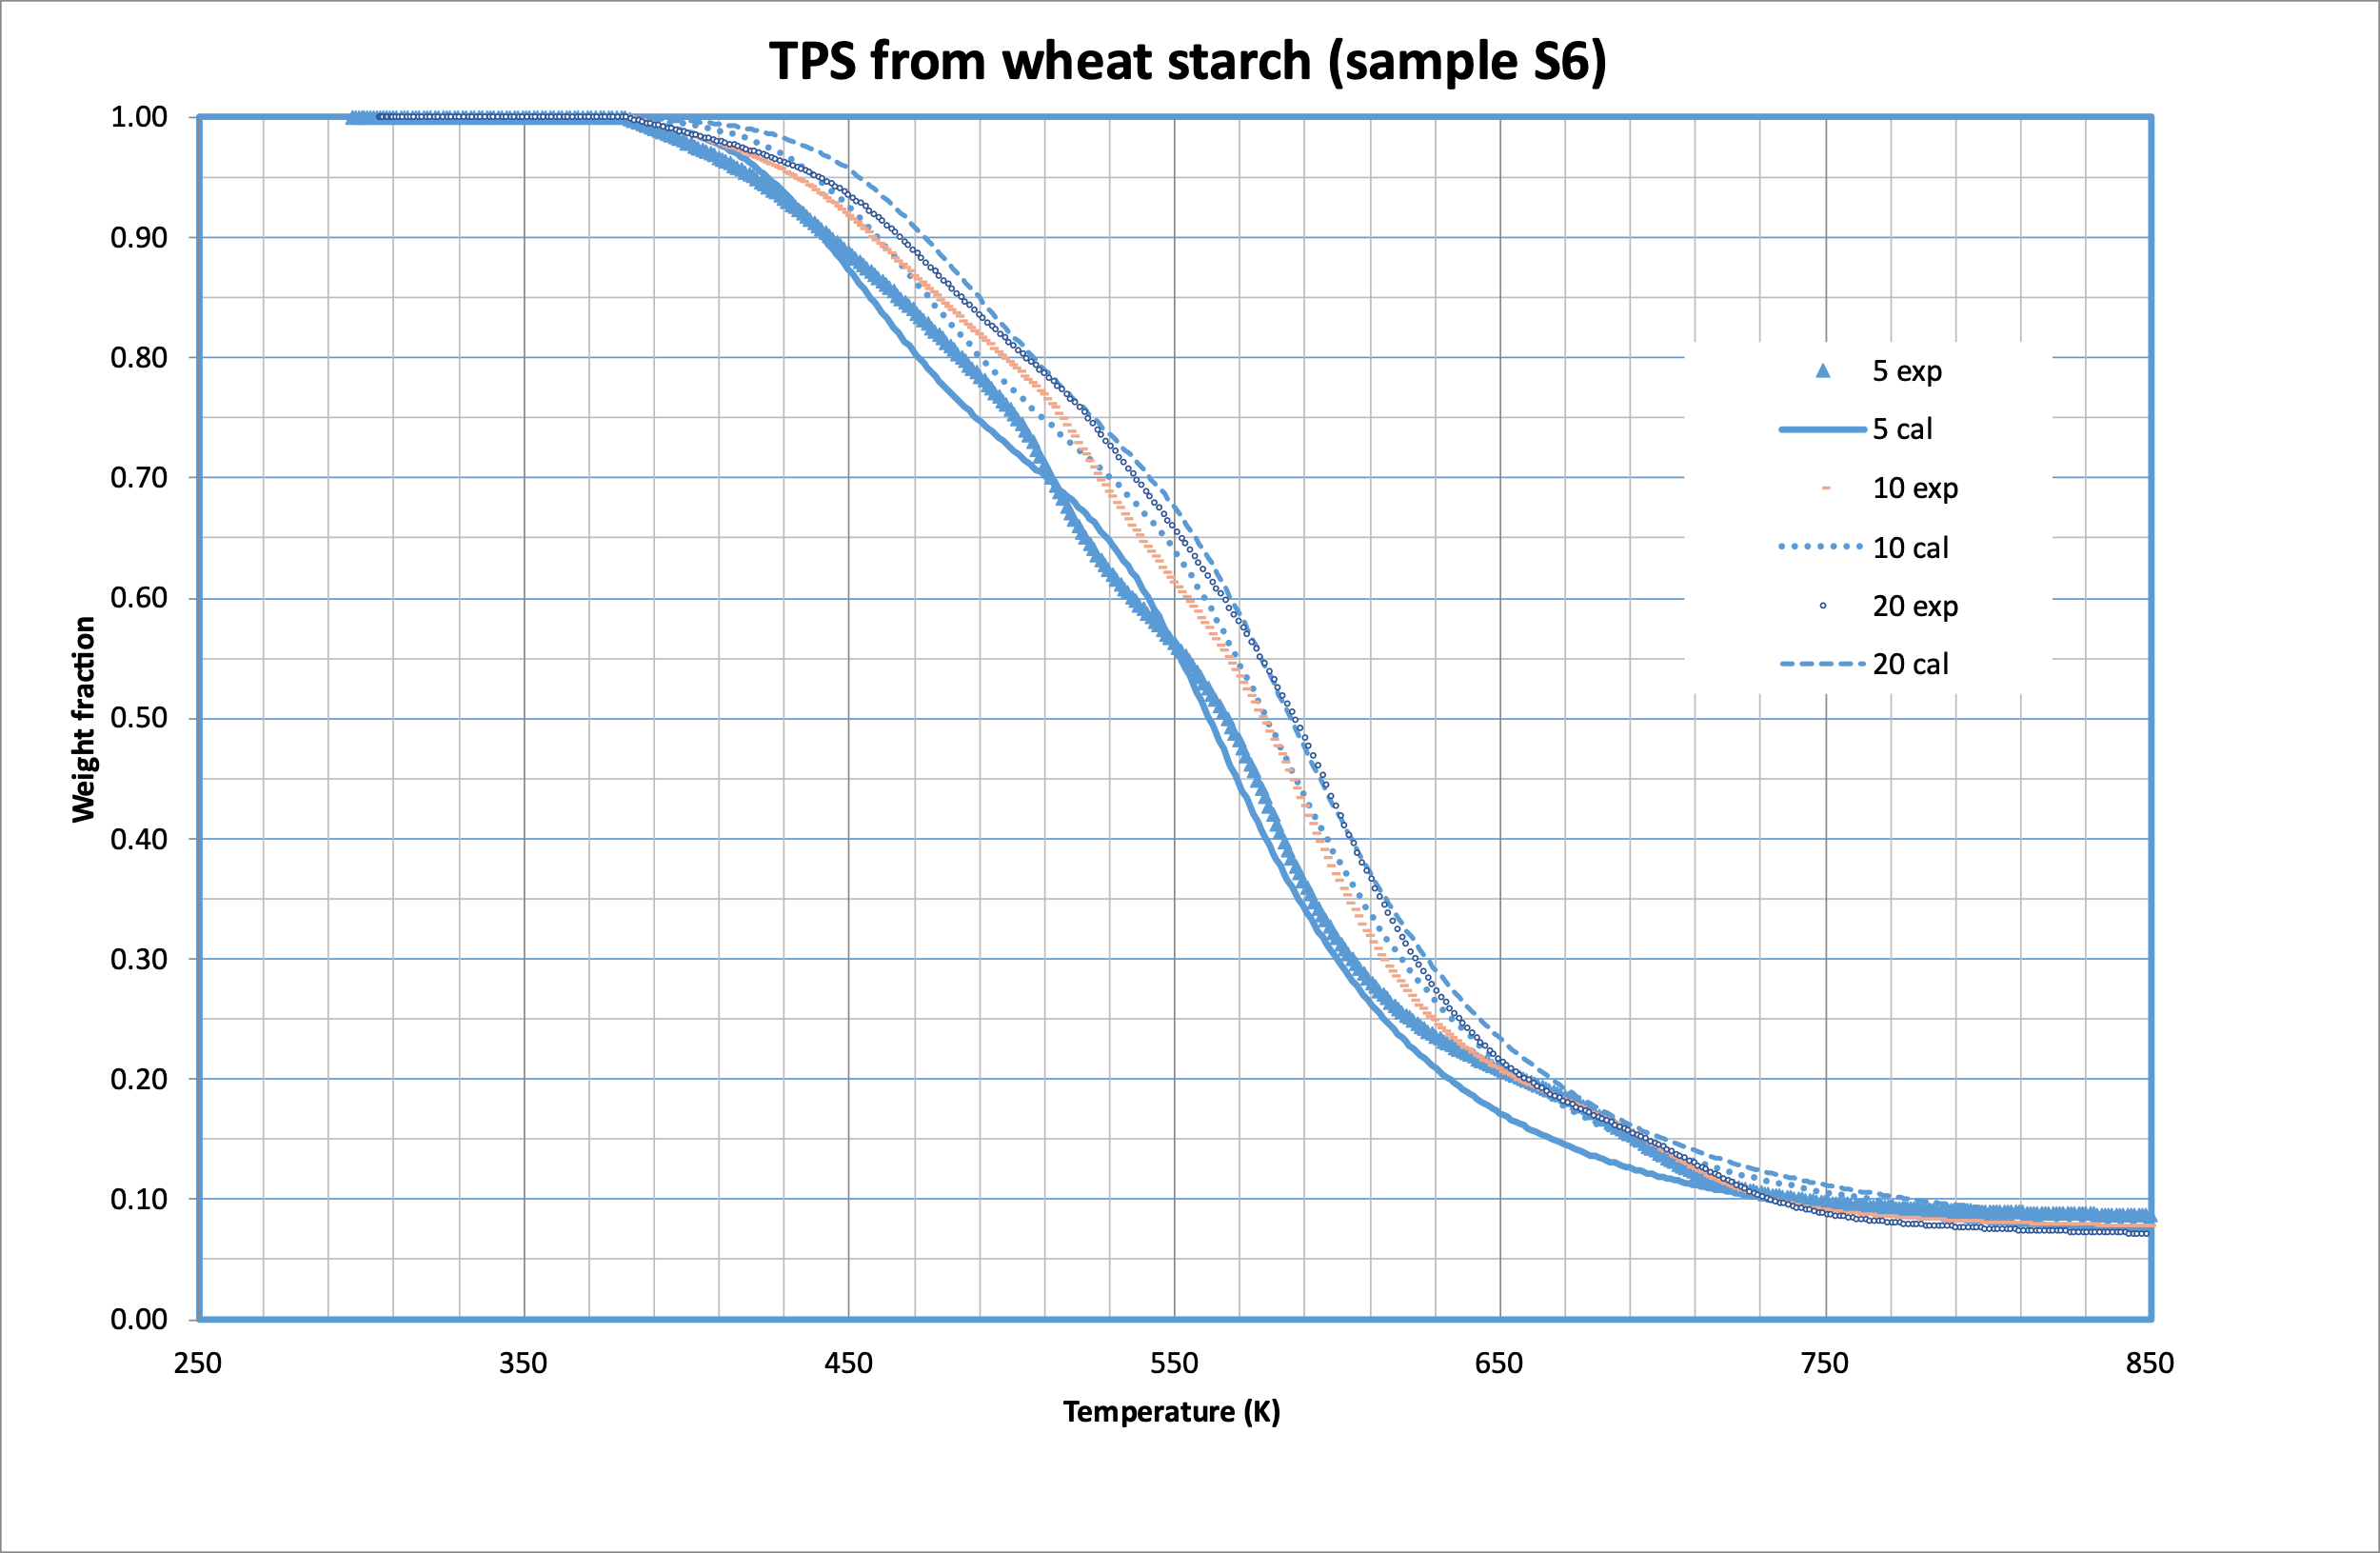


*Figure SM3. Pyrolysis of TPS from wheat starch at three heating rates.*


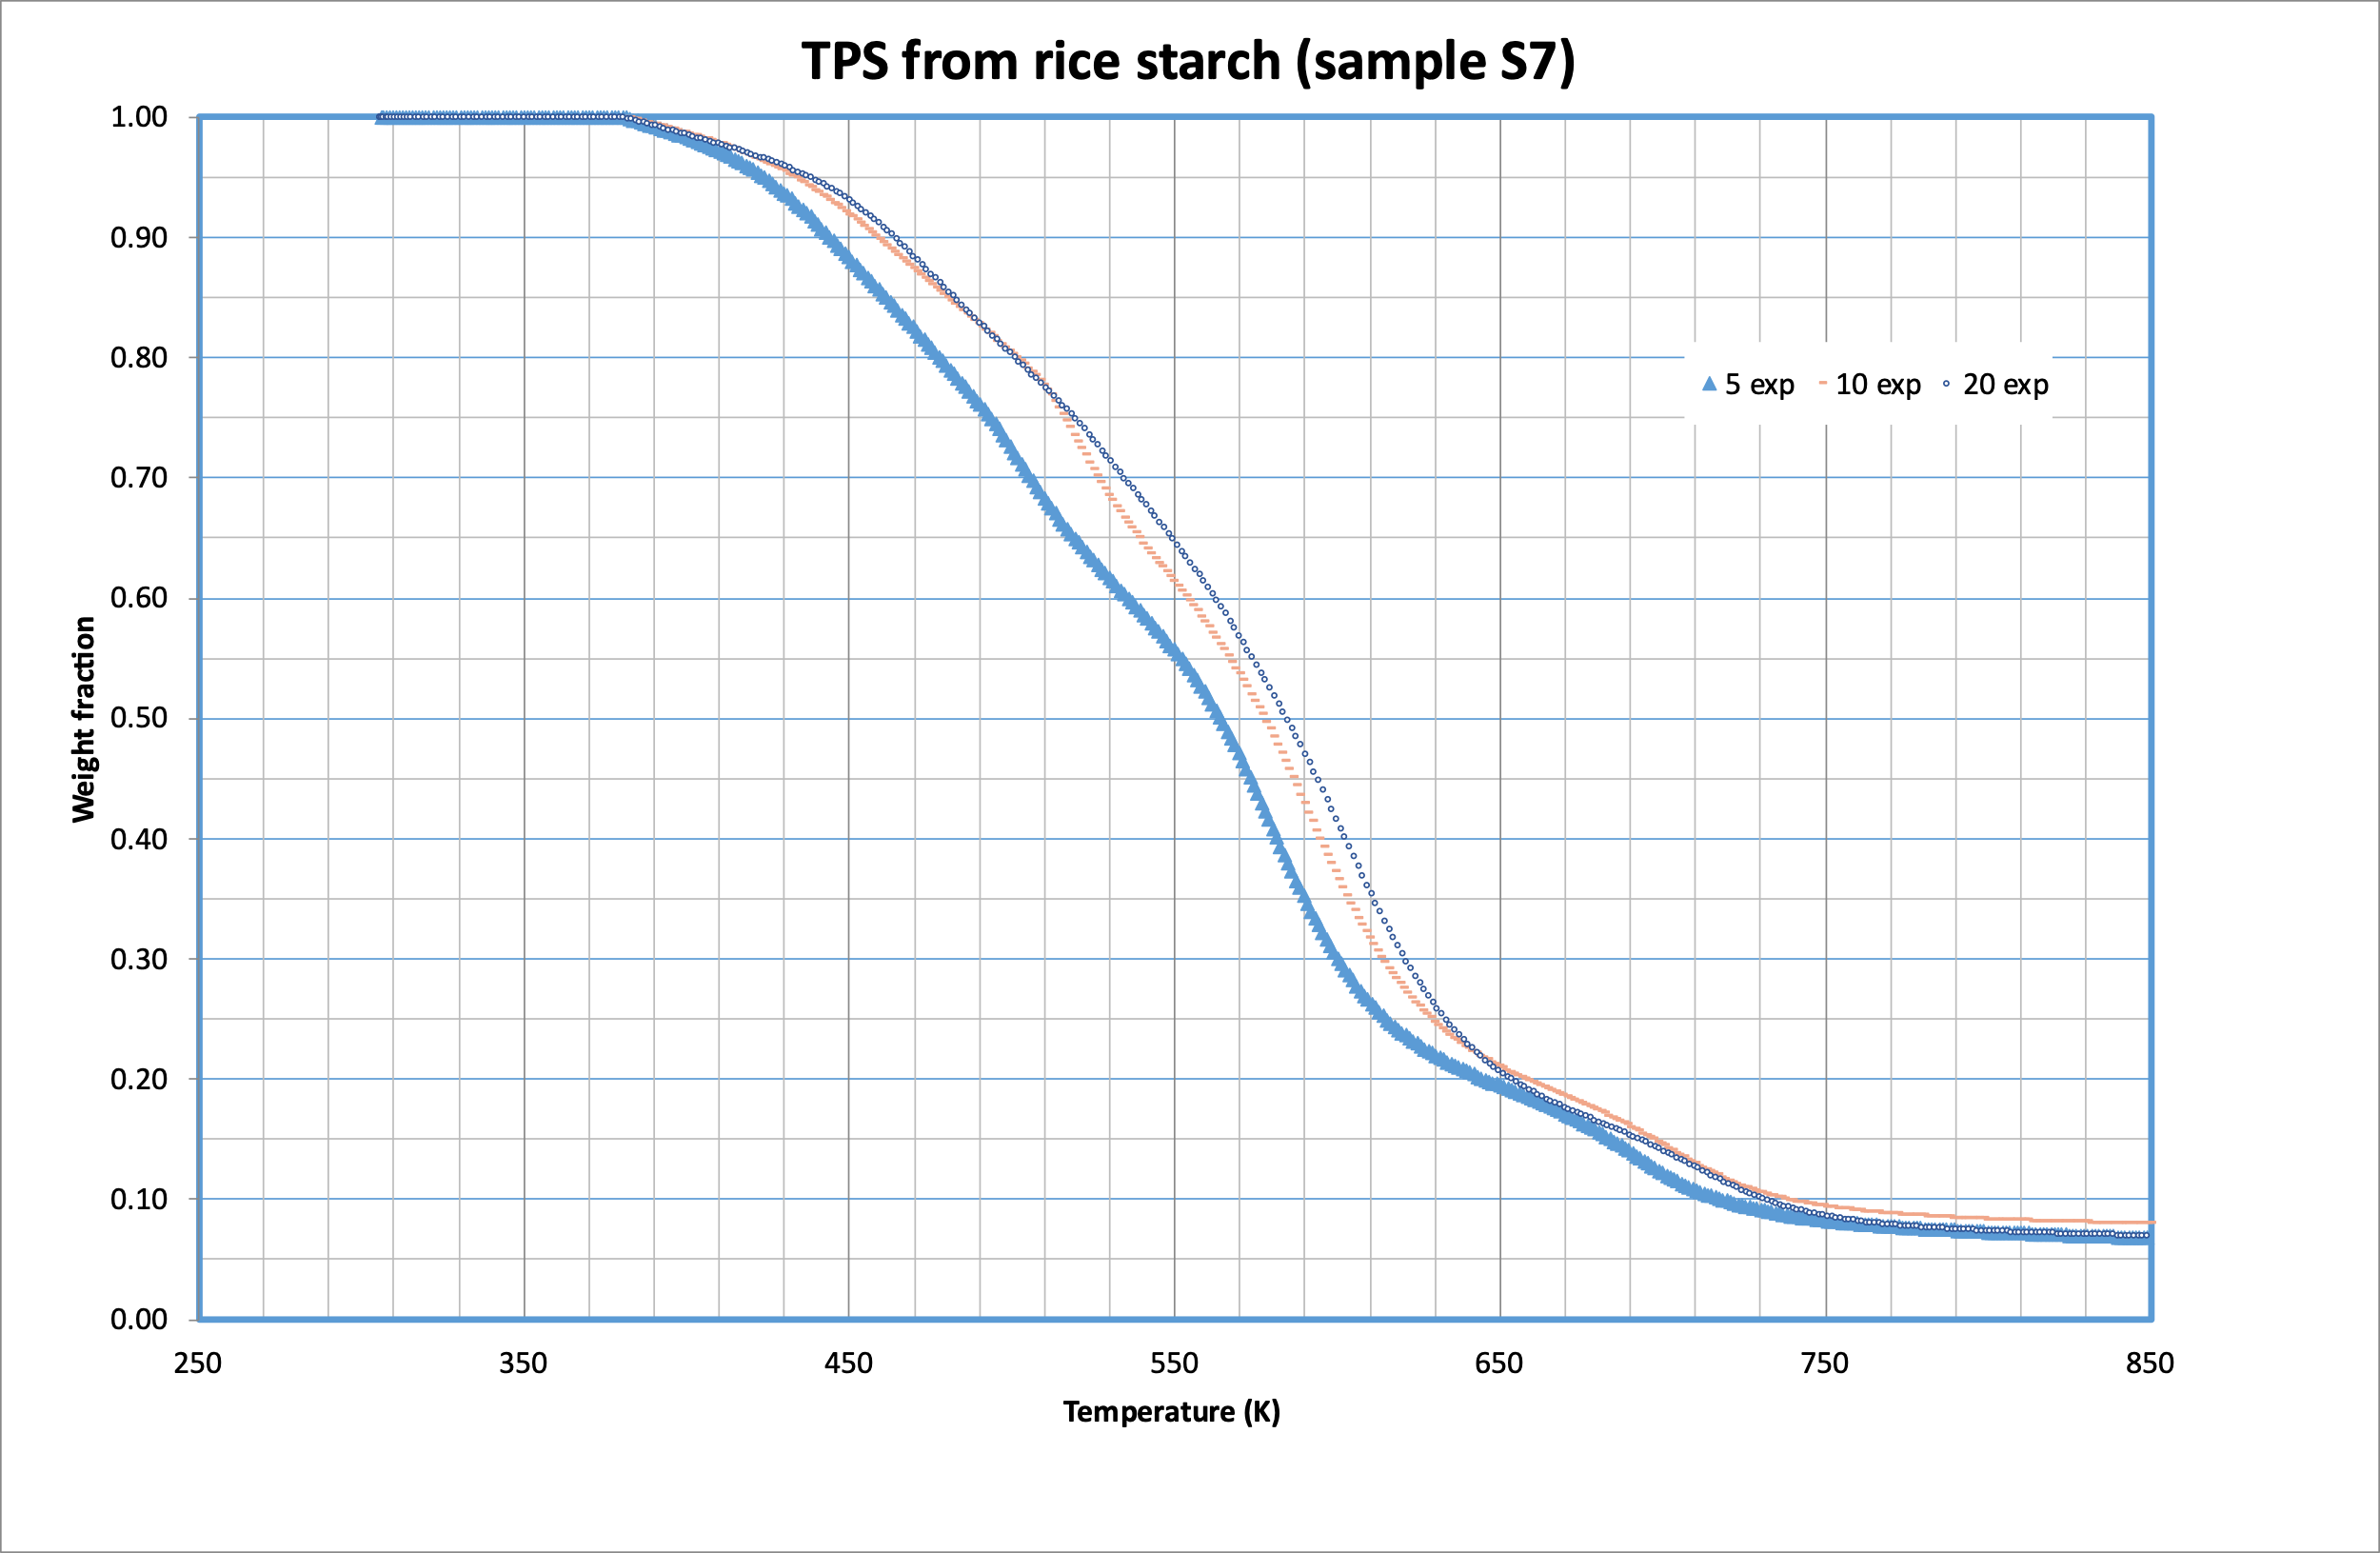


*Figure SM4. Pyrolysis of TPS from rice starch at three heating rates.*


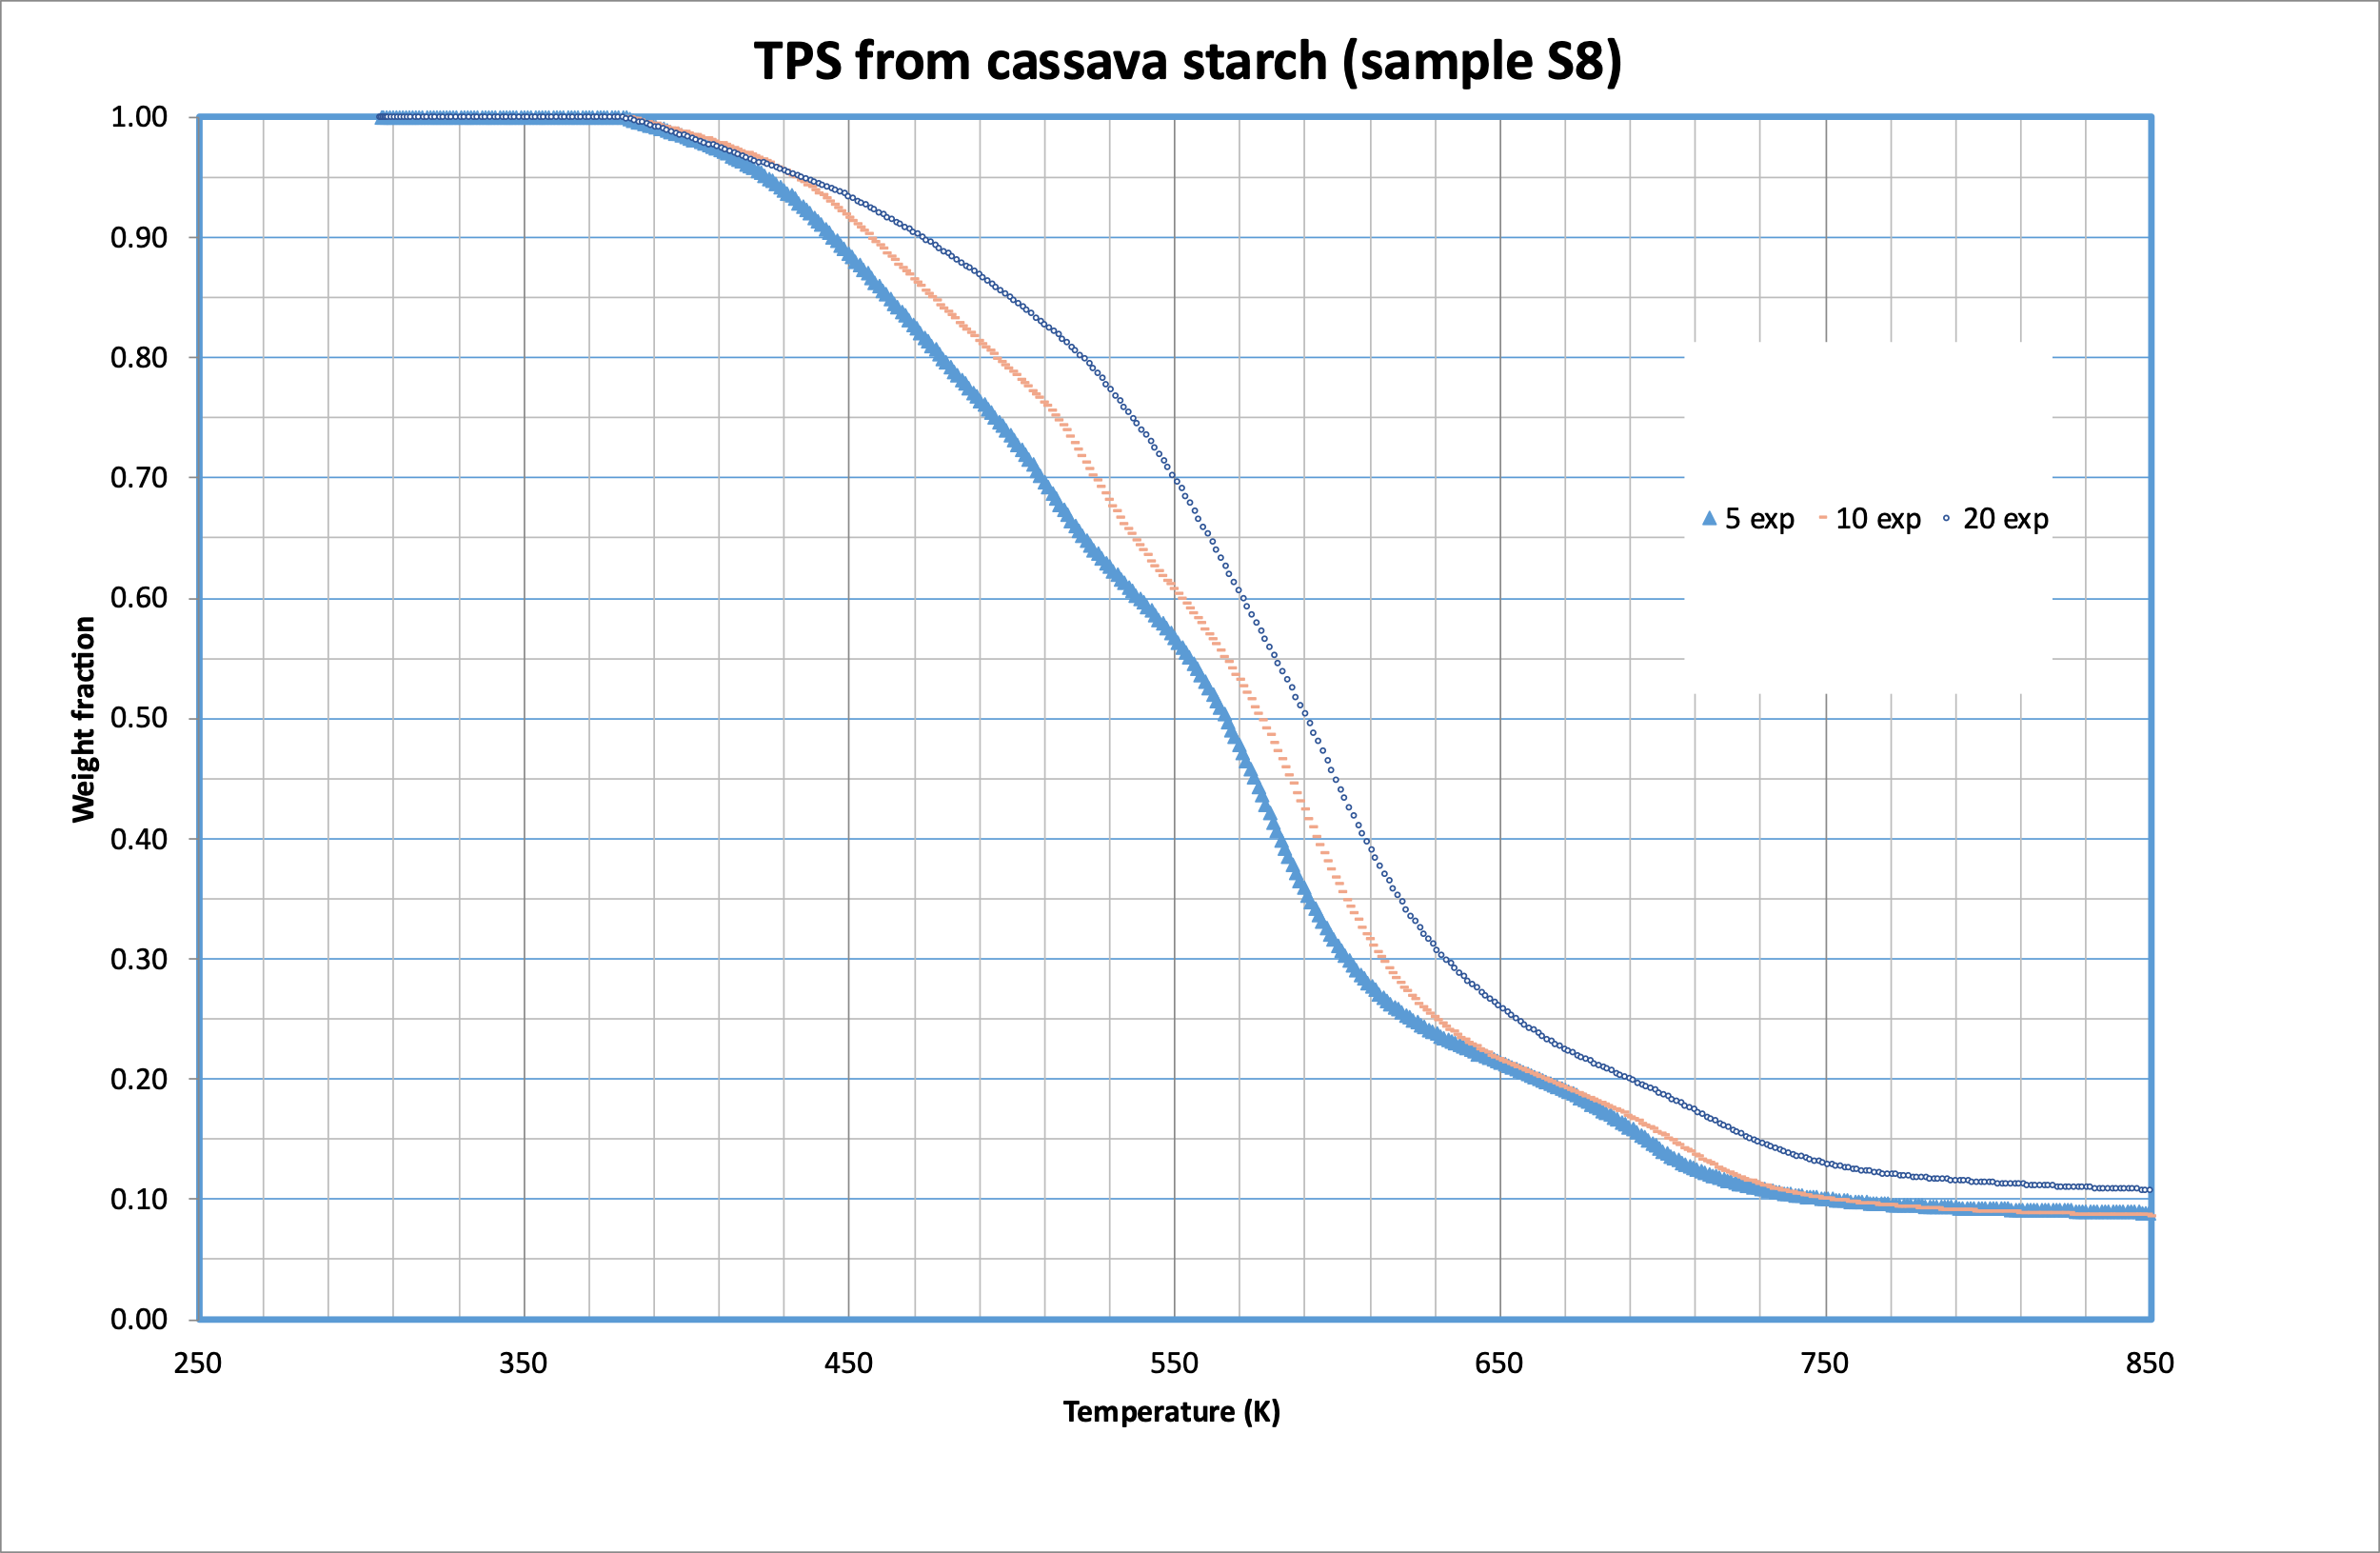


*Figure SM5. Pyrolysis of TPS from cassava starch at three heating rates.*


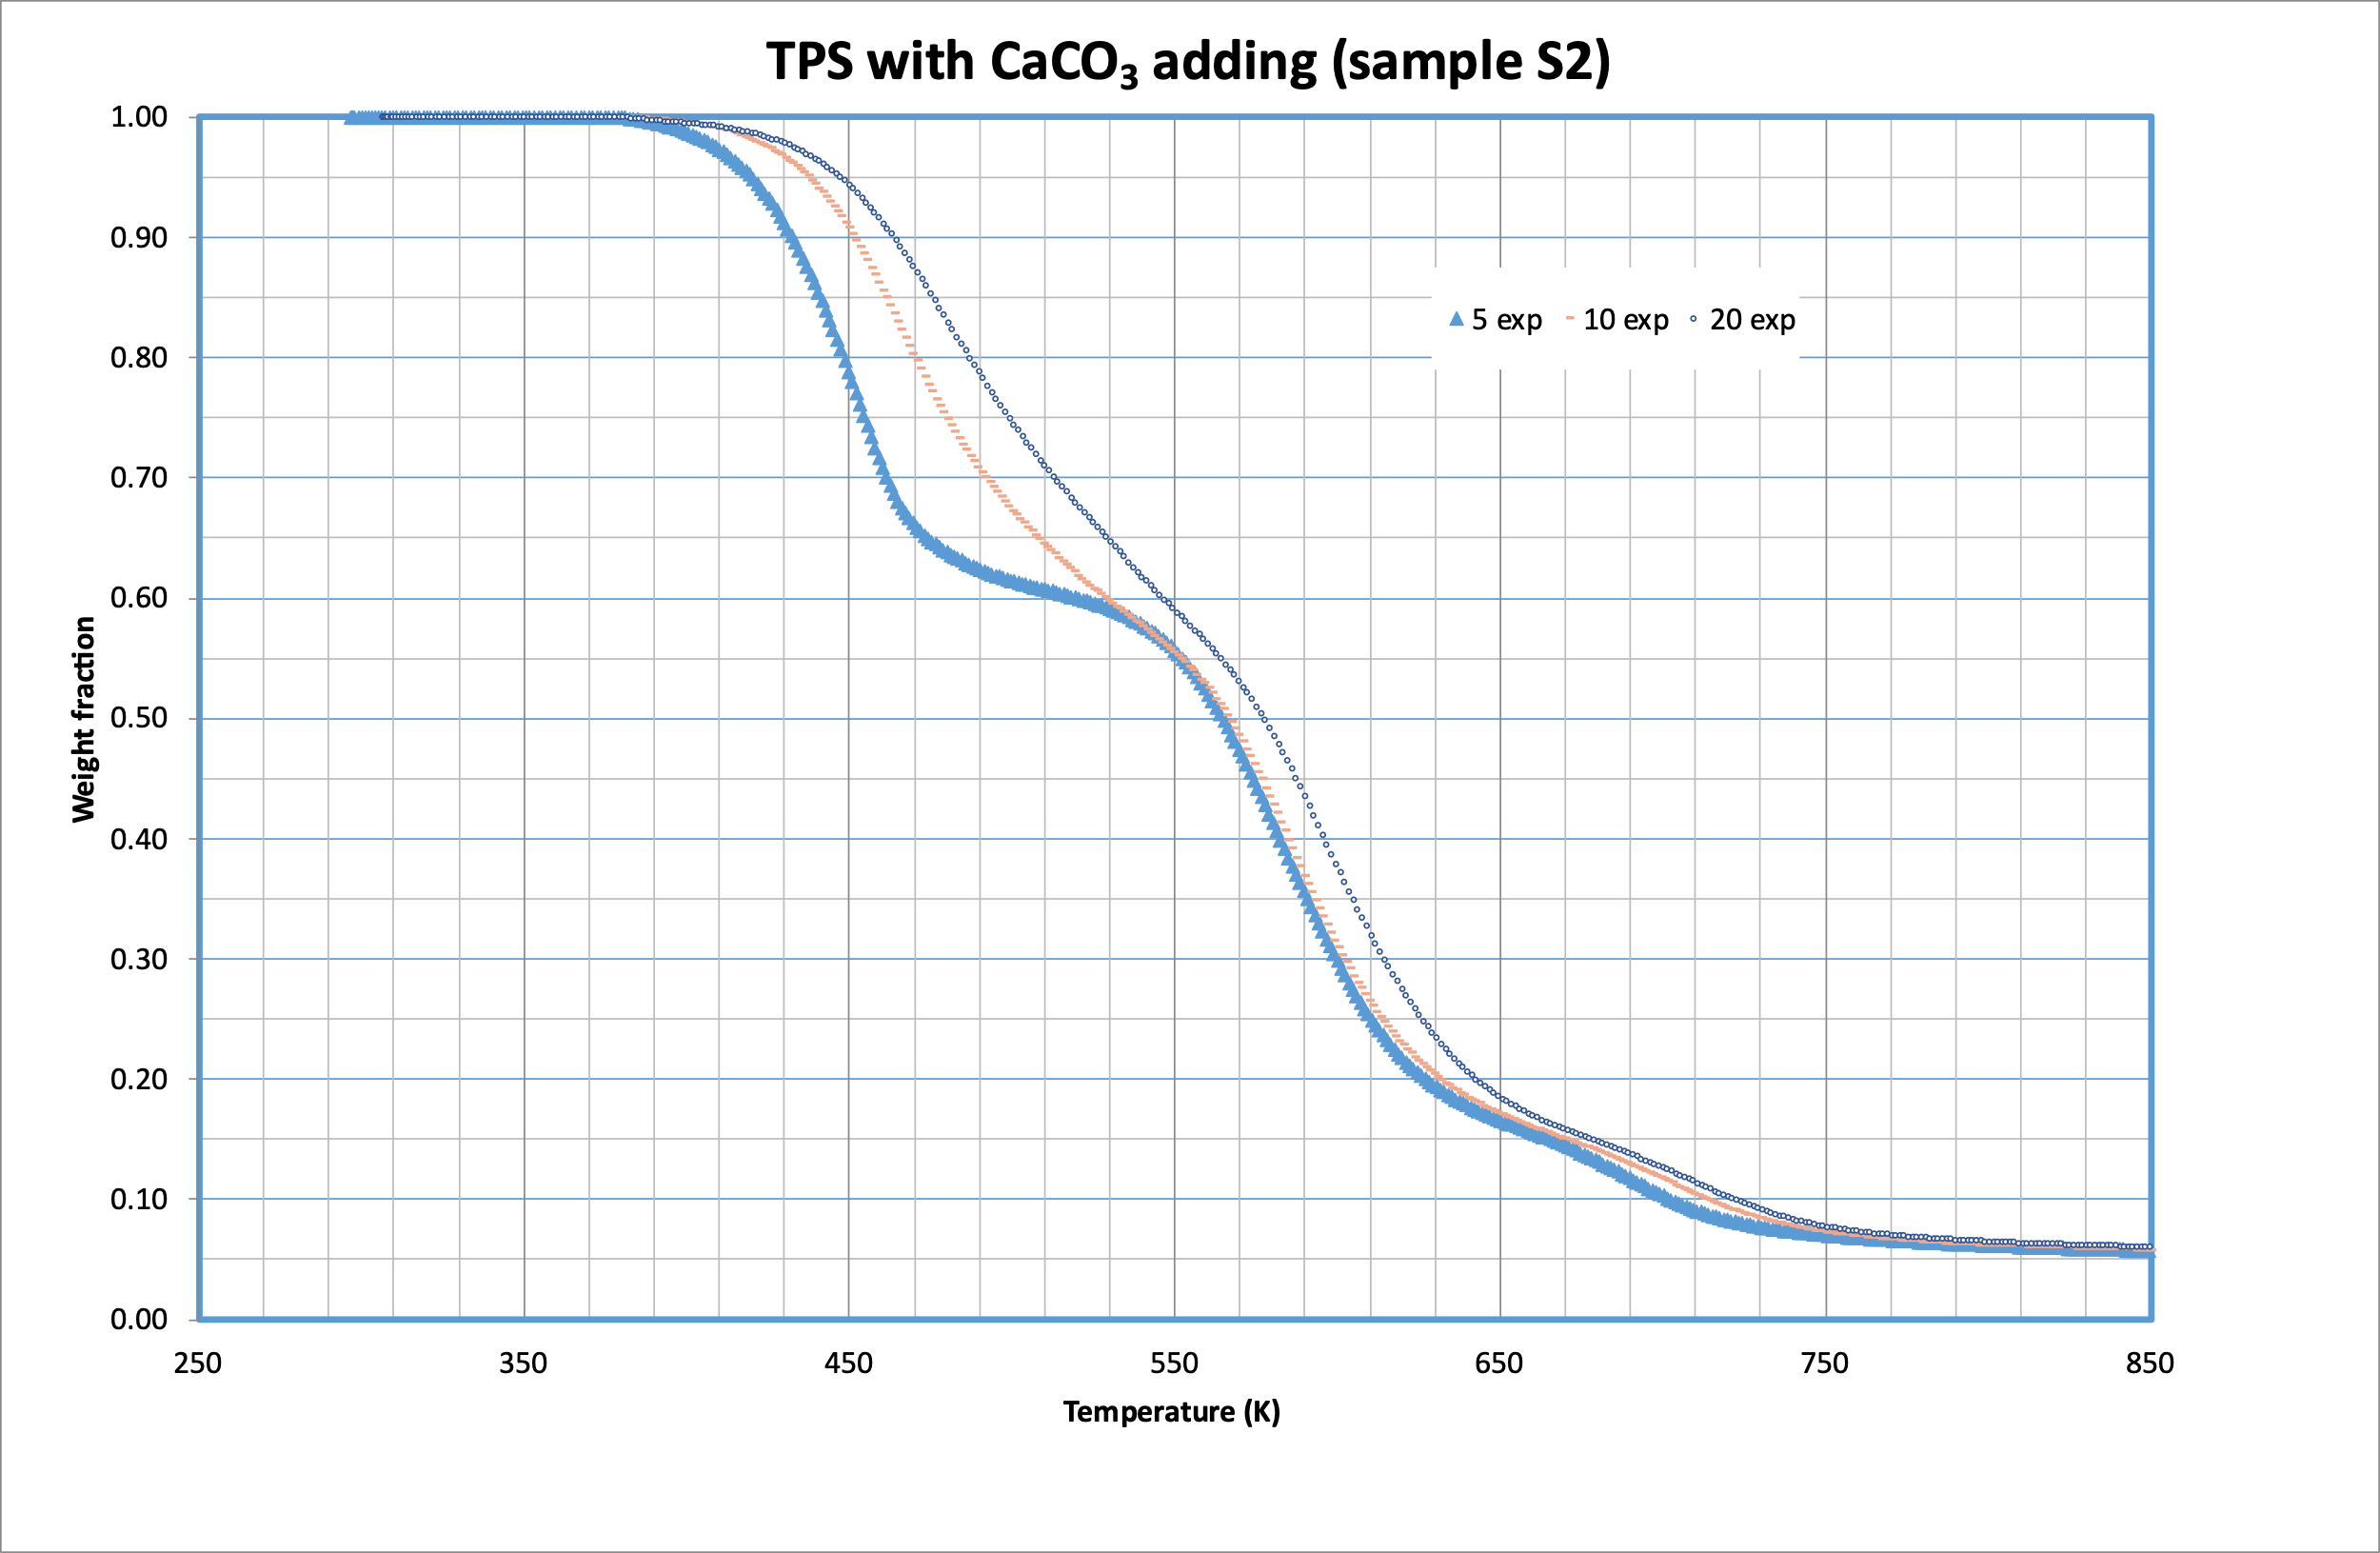


*Figure SM6. Pyrolysis of TPS from potato starch and 1 % CaCO3 adding at three heating rates.*


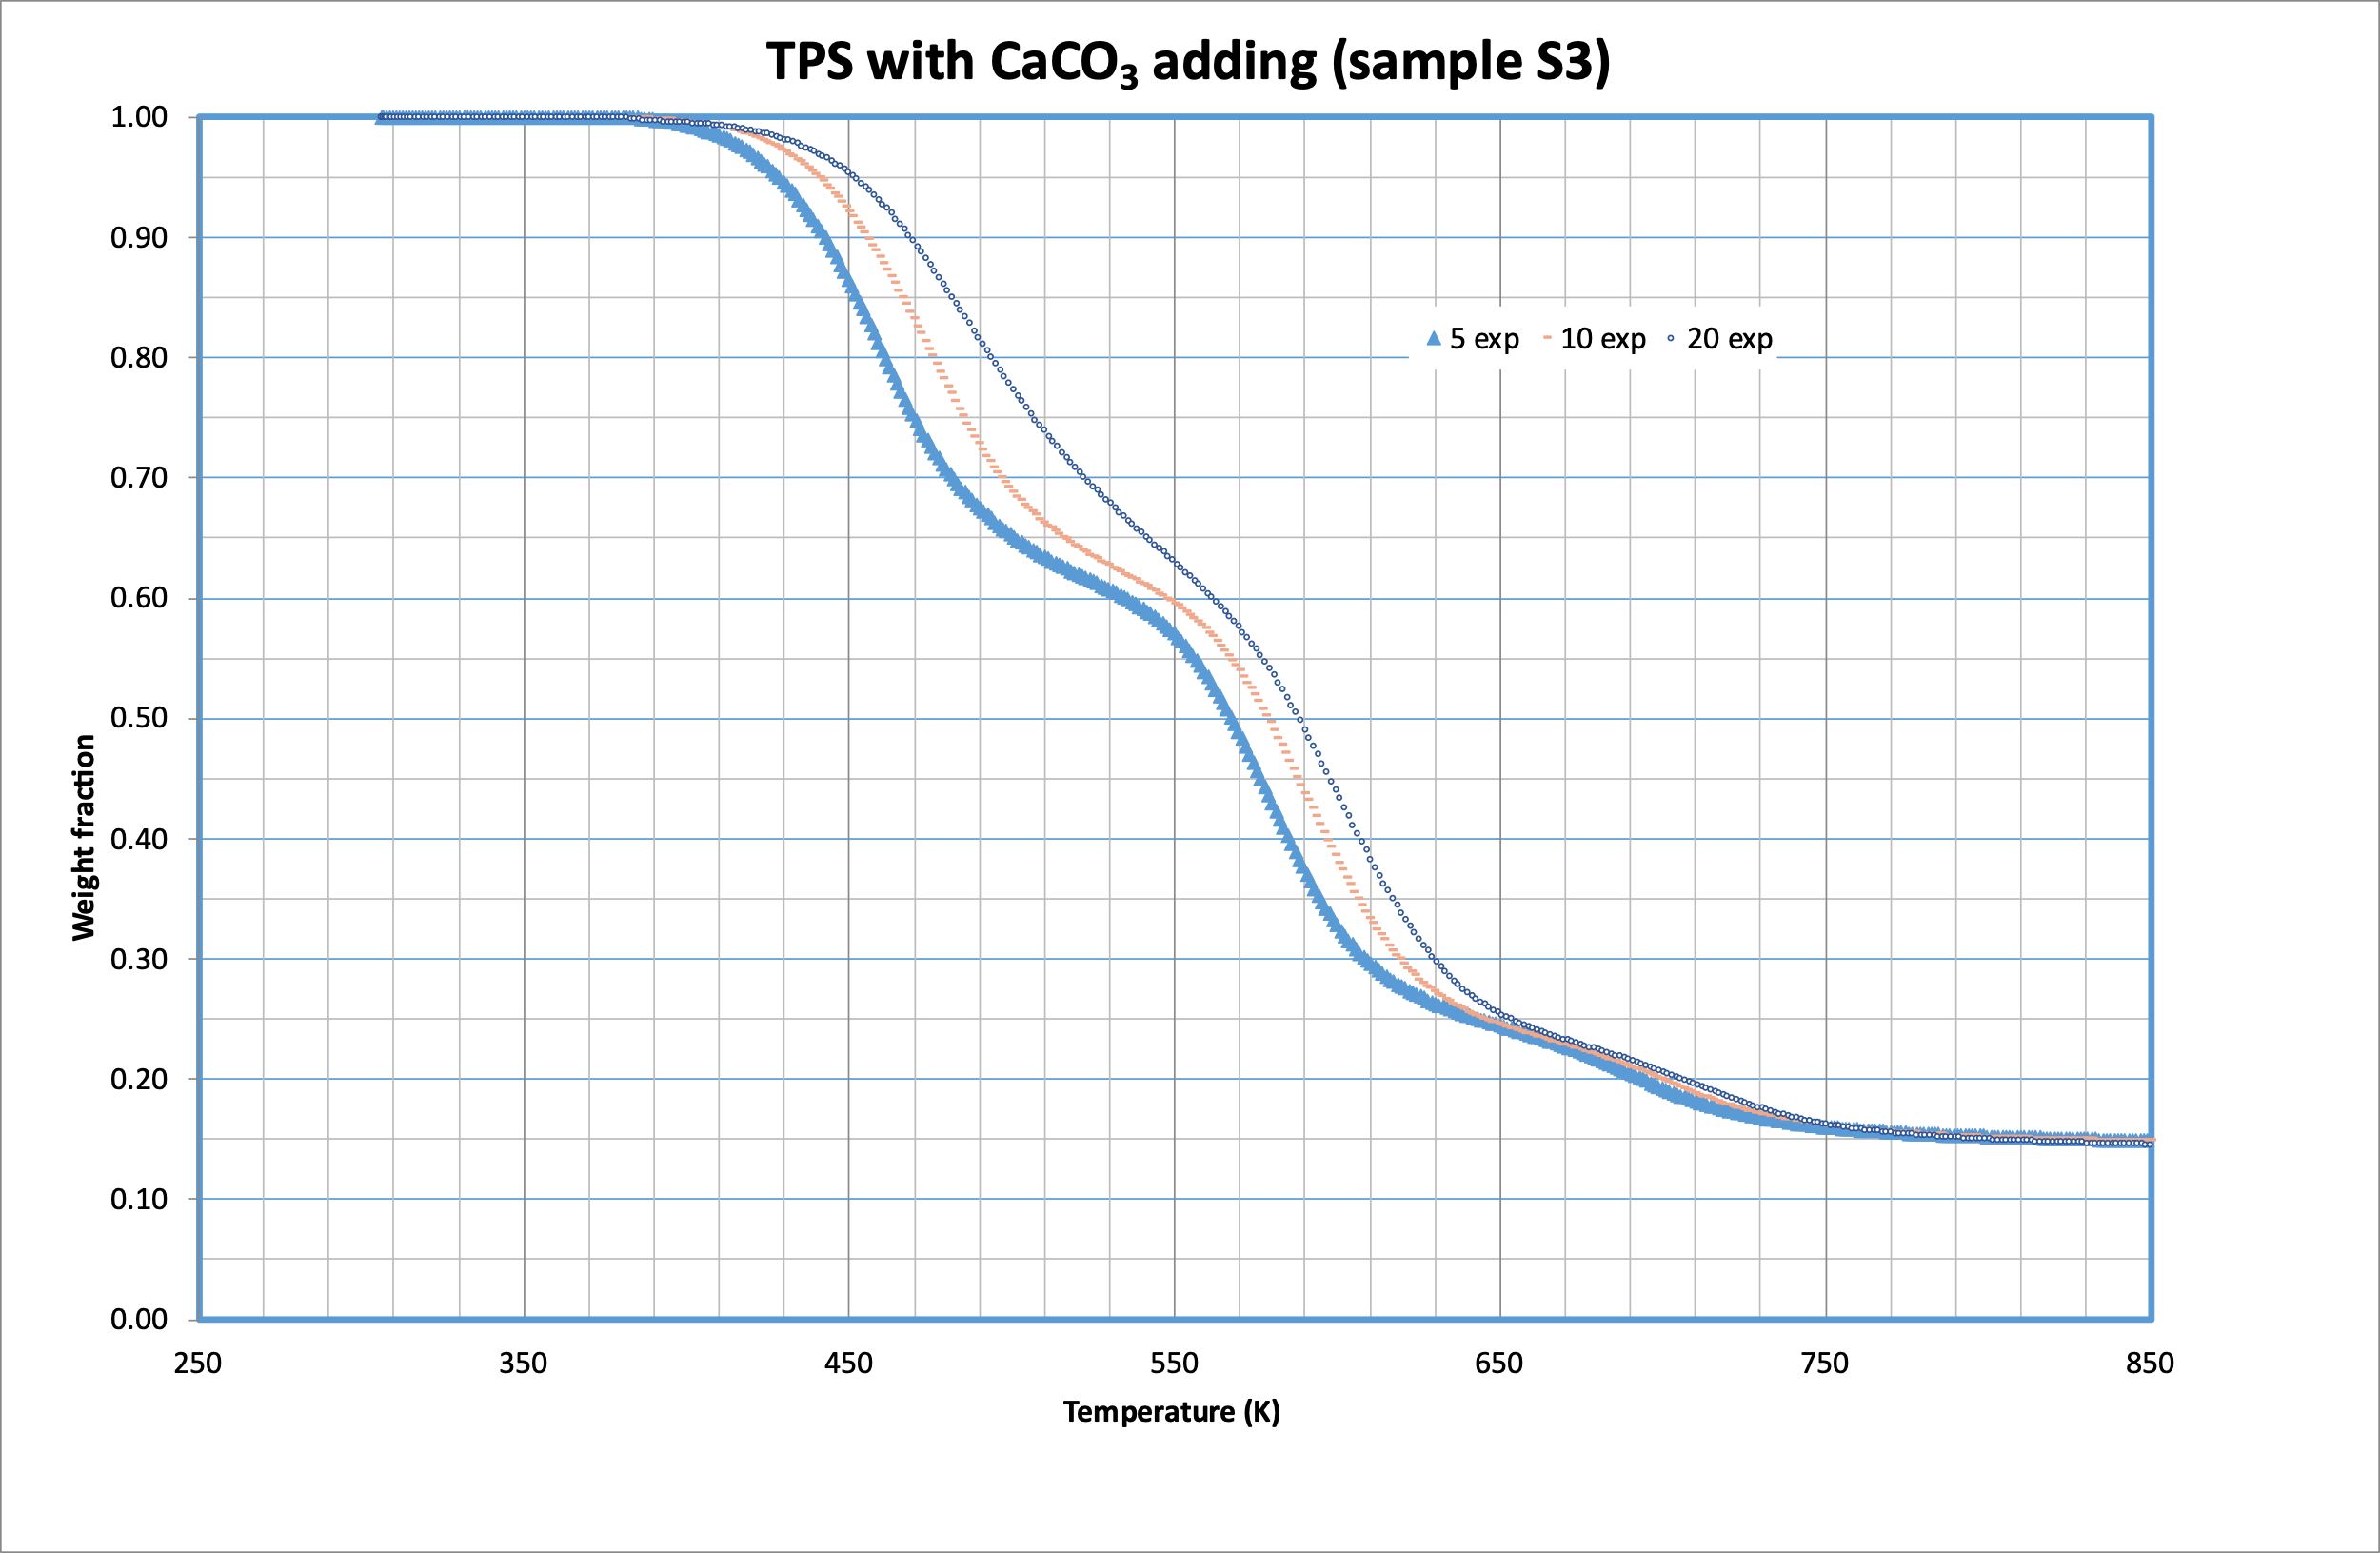


*Figure SM7. Pyrolysis of TPS from potato starch and 5 % CaCO3 adding at three heating rates.*
